# Supplementary material for: Colony stimulation factor-2 triggers NNMT-dependent myofibroblasts activation in head and neck cancer
Source: Research Square preprint supplement (doi:10.21203/rs.3.rs-8042404/v1), 2025-11-24
Supplement: Supplementary file 1 [file 515a72cdc82c8909faf1583c.docx]

**
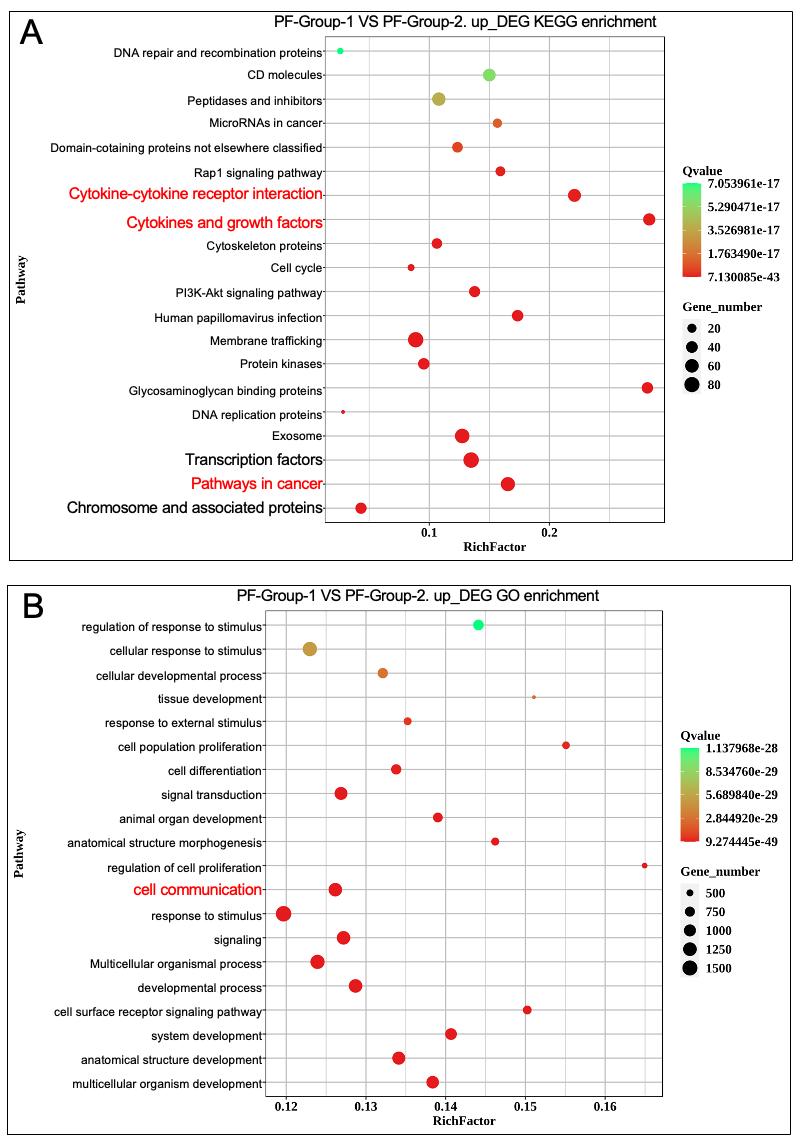
**

**Supplemental Figure 1, Transcriptomic profiling of PF activation by OSCC organoids.** A, B, KEGG (A) and GO (B) pathway analysis of upregulated genes in PFs co-cultured with tumor organoid (Group-1) versus that with mucosa organoid (Group-2). n=3 biological replicates; |log2FC|>1, FDR<0.05.


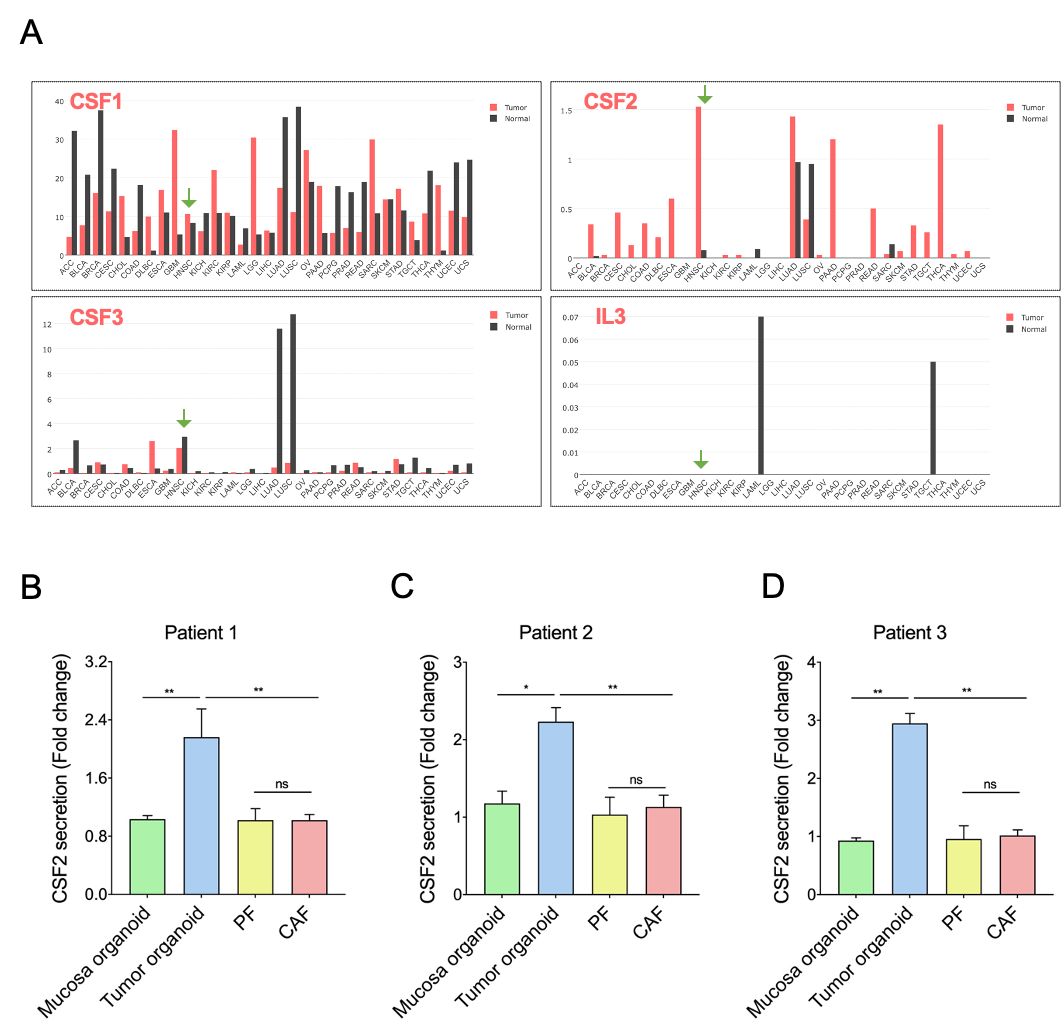


**Supplemental Figure 2, CSF2 expression patterns in HNSCC.** A, Pan-cancer analysis of CSF2 mRNA expression (TPM values) across 31 tumor types (GEPIA website: http://gepia.cancer-pku.cn). B-D, ELISA quantification of CSF2 secretion in conditioned media from tumor and mucosa organoids, PFs and CAFs (n=3). Data normalized to total protein concentration. Error bars represent mean ± s.d. (*p<0.05, **p<0.01, paired t-test).


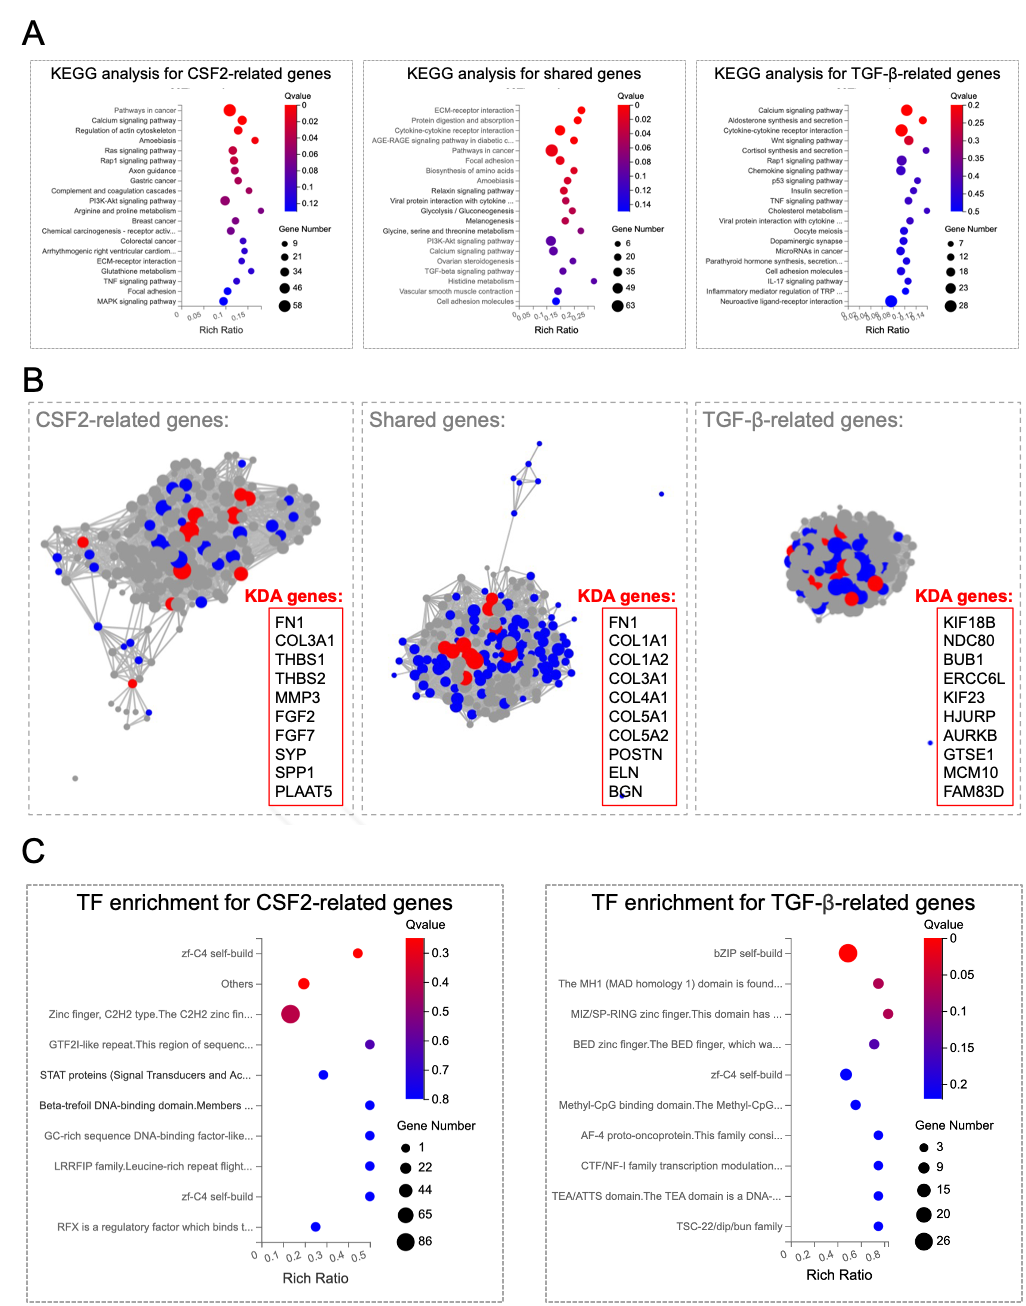


**Supplemental Figure 3, Comparison of CSF2- and TGF-β-induced transcription programs.** A, KEGG analysis of genes upregulated by CSF2 (left) and TGF-β1 (right), as well as their intersection (middle). B, Key Driver Analysis (KDA) network showing top 10 genes regulated by CSF2 (node size = expression fold change). C, Transcription factor analysis using RNA-seq data from PFs treated with CSF2 or TGF-β1.

**Supplemental Table S1.** Clinic-pathological information of 10 OSCC PDO samples

| No. | Organoid  Establishment | Fibroblast  Establishment | Age | Sex | Site | Pathology | TNM |
| --- | --- | --- | --- | --- | --- | --- | --- |
| 1 | Tu | CAF+PF | 36 | M | Tongue | OSCC | T2N2bM0 |
| 7 | Tu | CAF+PF | 40 | M | Tongue | OSCC | T2N0M0 |
| 8 | Tu+Mu | CAF+PF | 44 | M | Cheek | OSCC | T2N0M0 |
| 12 | Tu+Mu | CAF+PF | 38 | M | Cheek | OSCC | T3N2aM0 |
| 16 | Tu | CAF+PF | 60 | M | Tongue | OSCC | T3N0M0 |
| 17 | Tu+Mu | CAF+PF | 54 | M | Cheek, gingiva | OSCC | T2N2aM0 |
| 19 | Tu+Mu | CAF+PF | 57 | M | Cheek | OSCC | T4aN2M0 |
| 21 | Tu+Mu | CAF+PF | 34 | M | Tongue | OSCC | T2N0M0 |
| 25 | Failed | CAF+PF | 67 | F | Gingiva | OSCC | T4aN1M0 |
| 27 | Tu+Mu | CAF+PF | 54 | F | Cheek | OSCC | T1N0M0 |

**Abbrivation**

OSCC: oral suqmous cell carcinoma, No: number, Tu: Tumor, Mu: Mucosa, CAF: cancer-associated fibroblast, PF: paracanceous fibroblast, M: male, F: female, TNM: tumor node metastasis classification.

**Supplemental Table S2.** Sequence of qPCR primers.

| **Gene** | **Forward Primer (5' to 3')** | **Reverse Primer (5' to 3')** |
| --- | --- | --- |
| NNMT | GAGATCGTCGTCACTGACTACT | CACACACATAGGTCACCACTG |
| FOS | CCGGGGATAGCCTCTCTTACT | CCAGGTCCGTGCAGAAGTC |
| MAFK | GCACACATGGCAGAGAGAGT | GAGTCCTGCTCACCGTCAAA |
| NNMT  (For ChIP) | GACACCCGGCAACATTGTTT | TGGTCACAAAACCCACACCA |

**Supplemental Table S3.** Antibodies utilized in this study.

| Antibody | Resource | Identifier | Application |
| --- | --- | --- | --- |
| CSF2RA | Cell Signaling Technology | Cat# 69817; [[RRID: AB_3712883](https://www.antibodyregistry.org/update/3712883)](https://www.antibodyregistry.org/update/3712883) | WB |
| CSF2RA | Immunoway | Cat# YT5262; RRID: AB_3712886 | IF |
| CSF2RB | Immunoway | Cat# YT2333; RRID: AB_3712887 | WB |
| GM-CSF | Immunoway | Cat# YT6007; RRID: AB_3712888 | IF |
| NNMT | Cell Signaling Technology | Cat# 33361; RRID: AB_3076294 | IF, IHC, WB |
| NNMT | Abcam | Cat# ab119758; RRID: AB_10902083 | IF |
| COL1A1 | Cell Signaling Technology | Cat# 72026; RRID: AB_2904565 | IF, WB |
| pan-Keratin | Cell Signaling Technology | Cat# 4545; RRID: AB_490860 | IF |
| FN1 | Cell Signaling Technology | Cat# 26836; RRID: AB_2924220 | WB |
| MYLK | Proteintech | Cat# 21642-1-AP; RRID: AB_10734590 | WB |
| α-SMA | Cell Signaling Technology | Cat# 19245; RRID: AB_2734735 | WB |
| FAP | Cell Signaling Technology | Cat# 66562; RRID: AB_2904193 | WB |
| GFP | Proteintech | Cat# 50430-2-AP; RRID: AB_11042881 | IF |
| mCherry | Cell Signaling Technology | Cat# 43590; RRID: AB_2799246 | IF |
| c-FOS | Cell Signaling Technology | Cat# 31254; [RRID: AB_3712884](https://www.antibodyregistry.org/update/3712883) | WB |
| Phospho-c-FOS (Ser32) | Cell Signaling Technology | Cat# 5348; RRID: AB_10557109 | WB, IF, ChIP |
| Lamin B1 | Affbiotech | Cat# AF5161; RRID: AB_2837647 | WB |
| JAK2 | Cell Signaling Technology | Cat# 3230; RRID: AB_2128522 | WB |
| Phospho-JAK2 | Cell Signaling Technology | Cat# 3771; RRID: AB_330403 | WB |
| TGF-βR | Cell Signaling Technology | Cat# 49728; RRID: AB_3712889 | WB |

WB: western blot, IF: immunofluorescence, IHC: immunohistochemistry, ChIP: Chromatin immunoprecipitation.
